# Supplementary material for: Sequencing of the Arabidopsis NOR2 reveals its distinct organization and tissue-specific rRNA ribosomal variants
Source: PubMed Central journal article supplement (PMC7810690; doi:10.1038/s41467-020-20728-6), 2021-01-15
Supplement: 41467_2020_20728_MOESM1_ESM.pdf [file 41467_2020_20728_MOESM1_ESM.pdf]

# Sequencing of the *Arabidopsis* NOR2 reveals its distinct organization and tissue-specific rRNA ribosomal variants

Jason Sims<sup>1,3,#</sup>, Giovanni Sestini<sup>1,3,4</sup>, Christiane Elgert<sup>2</sup>, Arndt von Haeseler<sup>2</sup> and Peter Schlögelhofer<sup>1,#</sup>

<sup>1</sup>Department of Chromosome Biology, Max Perutz Labs, University of Vienna, Vienna BioCenter, Vienna, Austria

<sup>2</sup>Center for Integrative Bioinformatics Vienna (CIBIV), Max Perutz Labs, University of Vienna and Medical University of Vienna, Vienna BioCenter, Vienna, Austria

<sup>3</sup>These authors contributed equally

<sup>4</sup>Current address: Institute of Molecular Biotechnology of the Austrian Academy of Sciences (IMBA), Vienna Biocenter (VBC), 1030 Vienna, Austria

#corresponding authors: [jason.sims@univie.ac.at](mailto:jason.sims@univie.ac.at), [peter.schloegelhofer@univie.ac.at](mailto:peter.schloegelhofer@univie.ac.at)

## SUPPLEMENTARY INFORMATION

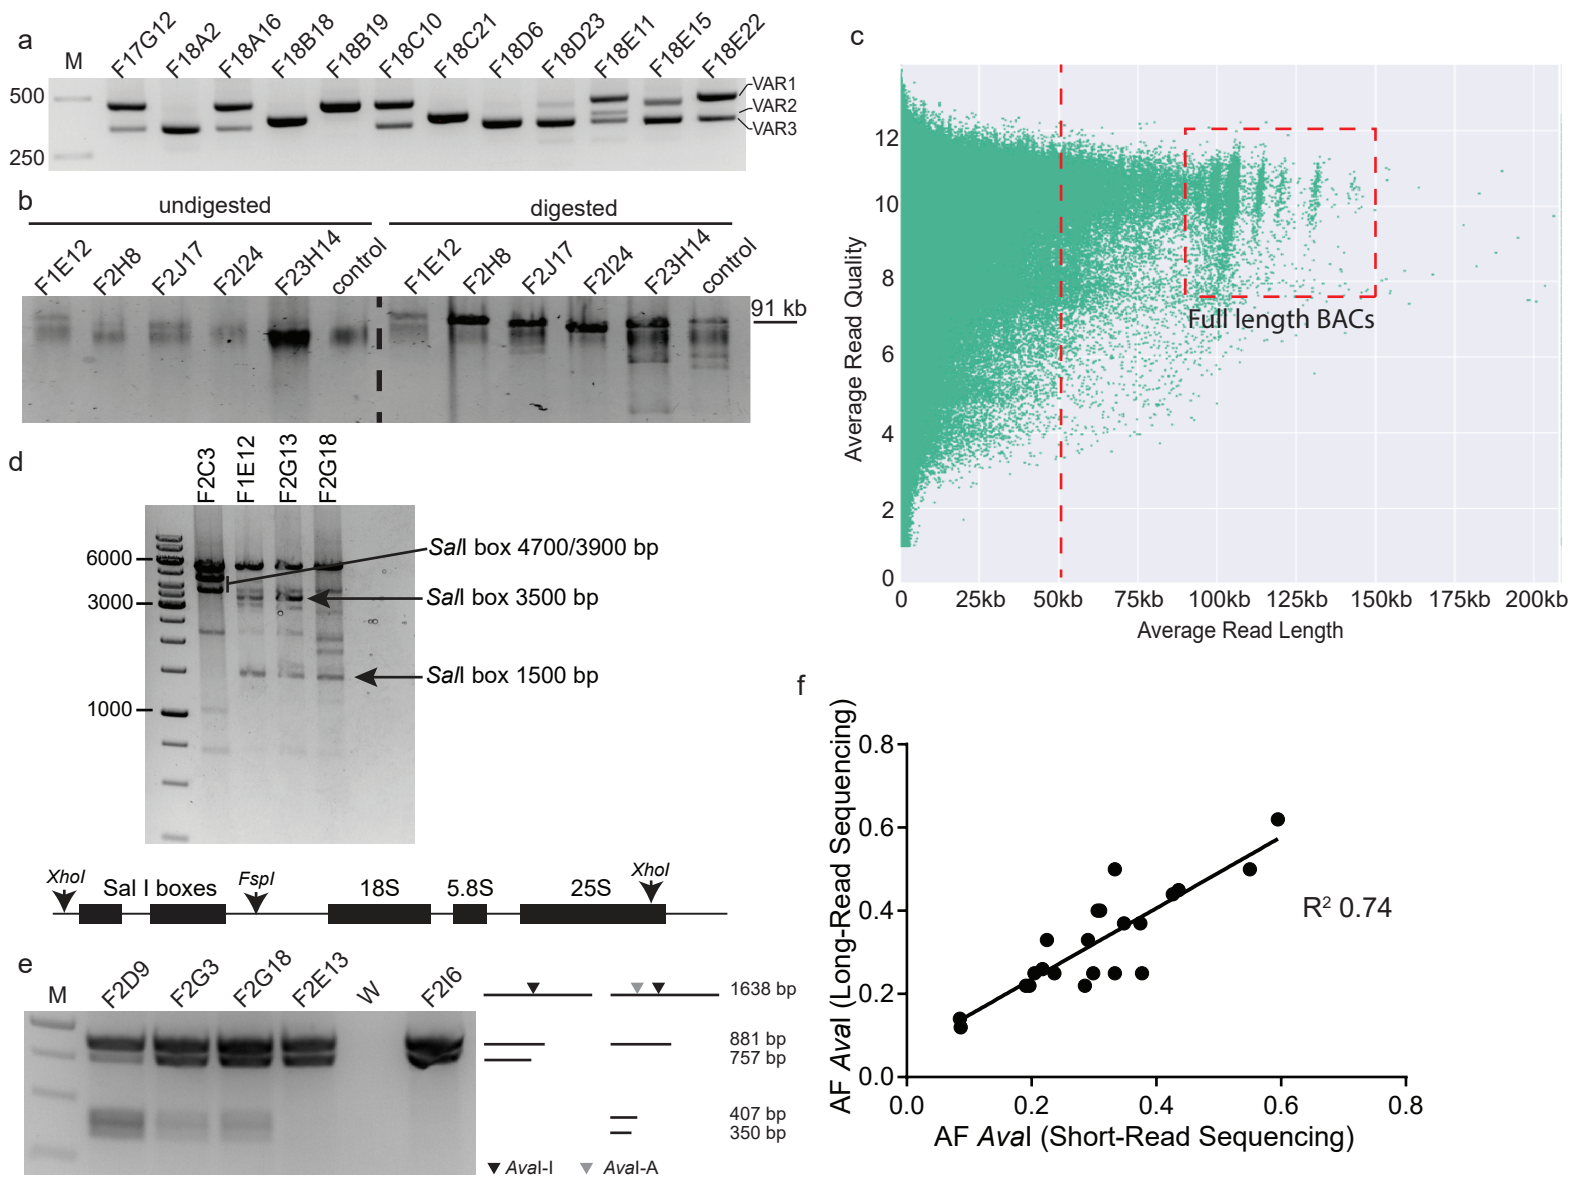

**Supplementary Fig. 1: Sequencing and polishing BACs containing rDNA genes**

**a**, Example of an agarose gel depicting the different 3'ETS variants (VAR 1-3) located within BACs. The experiment was repeated twice with similar results. **b**, Example of a pulse field agarose gel with samples of BACs ("control" depicts BAC T15P10 that contains only one rDNA unit) before and after digestion with *Apal* which linearizes the BACs without compromising the rDNA units. The BAC F23H14 is of a known size of ~91 kb (GenBank: AC006837.16). The experiment was repeated twice with similar results. **c**, Plot showing an example of a NanoPore multiplex run. The individual reads are plotted according to average read quality vs. read length. Full length sequenced BACs can be visualized as clustered reads of  $\geq 90$  kb (red dashed box). Red dashed line marks the 50 kb threshold used for the assembly. **d**, Example of a restriction digest gel which confirms the correct assembly of the BACs F2C3, F1E12, F2G13, F2G18. The BACs were digested with *XhoI* and *FspI* that cut at the borders of the *SalI* boxes and within the 25S rDNA. Arrows show the released *SalI* boxes at the expected sizes. The experiment was repeated twice with similar results. **e**, Example of an agarose gel showing the analysis of the presence/absence of the polymorphism at position 4133 (of the reference rDNA) that creates a CAPS marker that can be cleaved with *AvaI*. BACs F2D9, F2G3 and F2G18 contain the *AvaI* site, BACs F2E13 and F2I6 not. Black arrow heads indicate an *AvaI* site present in all rDNA units (*AvaI*-I), grey arrow heads indicate the cut site of the allelic *AvaI* site (*AvaI*-A). The experiment was repeated twice with similar results. **f**, Correlation analysis of the *AvaI* allele frequencies derived from either long- or short- read sequencing approaches. Each dot represents an individual assembly.

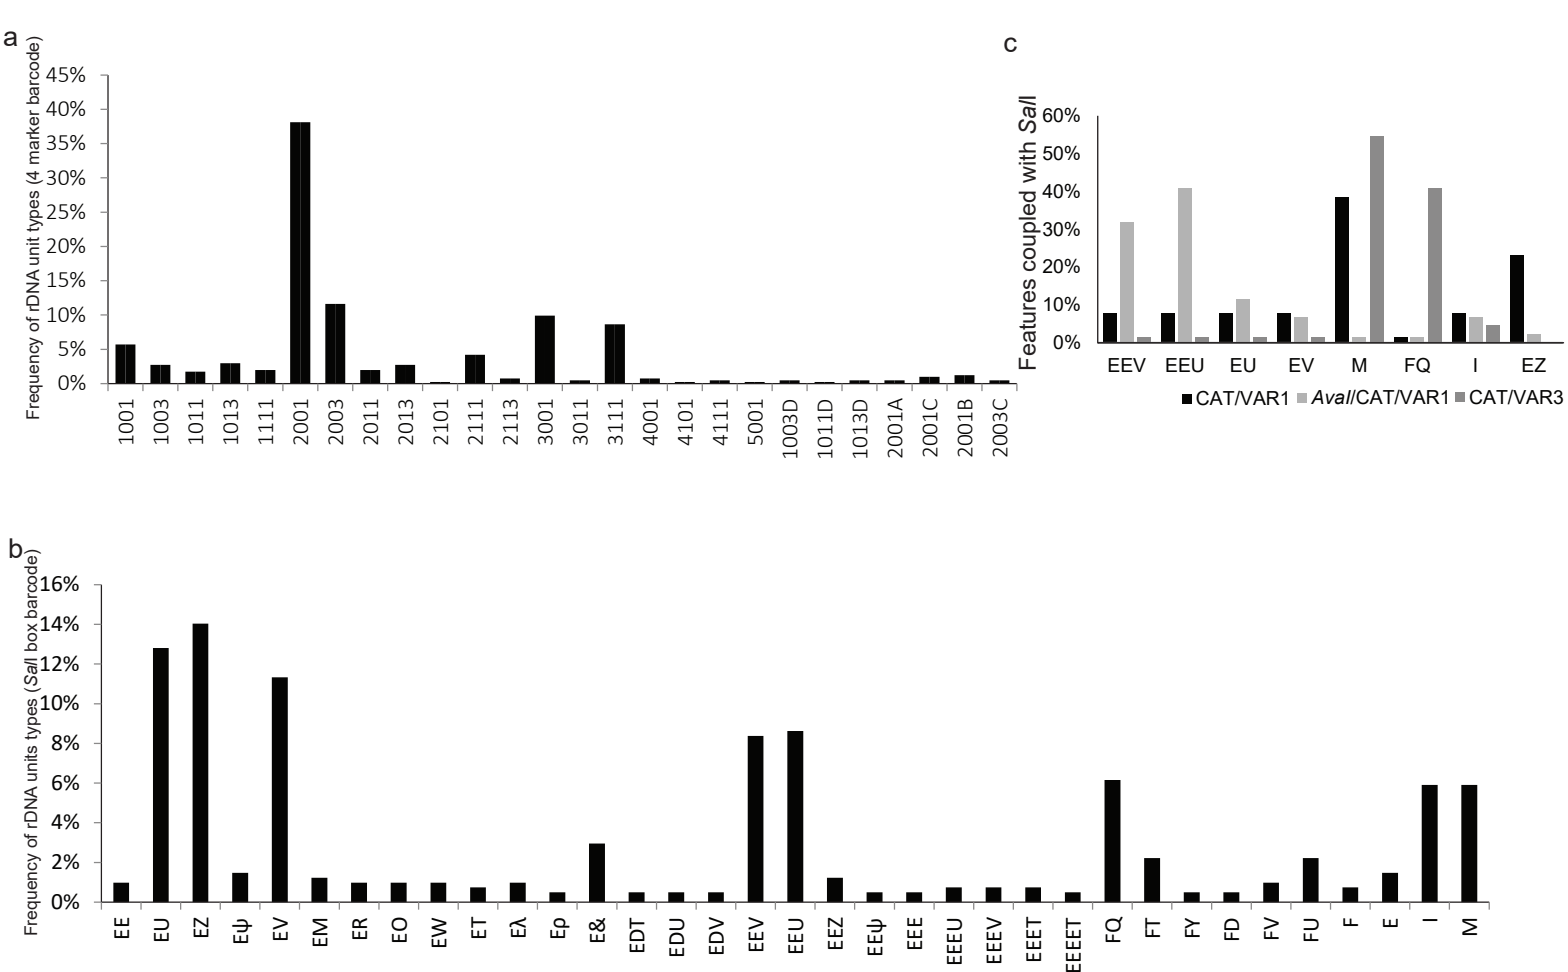

**Supplementary Fig. 2: NOR2 contains a heterogeneous population of rDNA units**

**a**, Graph depicting the percentage of rDNA units with the feature combinations: number of promoters (1 to 5), presence (1) or absence (0) of the Aval restriction site, presence (1) or absence (0) of the CAT polymorphism and length of the 3' ETS variant (1 or 3), presence of the deletion A-D. **b**, Percentage of rDNA variants carrying a certain Sall box combination (see Table 1 for glossary). **c**, Percentage of rDNA variants 011 (black, presence of CAT and VAR1), 111 (dark gray, presence of Aval, presence of CAT and VAR1) and 013 (light gray, presence of CAT and VAR3) associated with different Sall box combinations (see Table 1 for glossary).

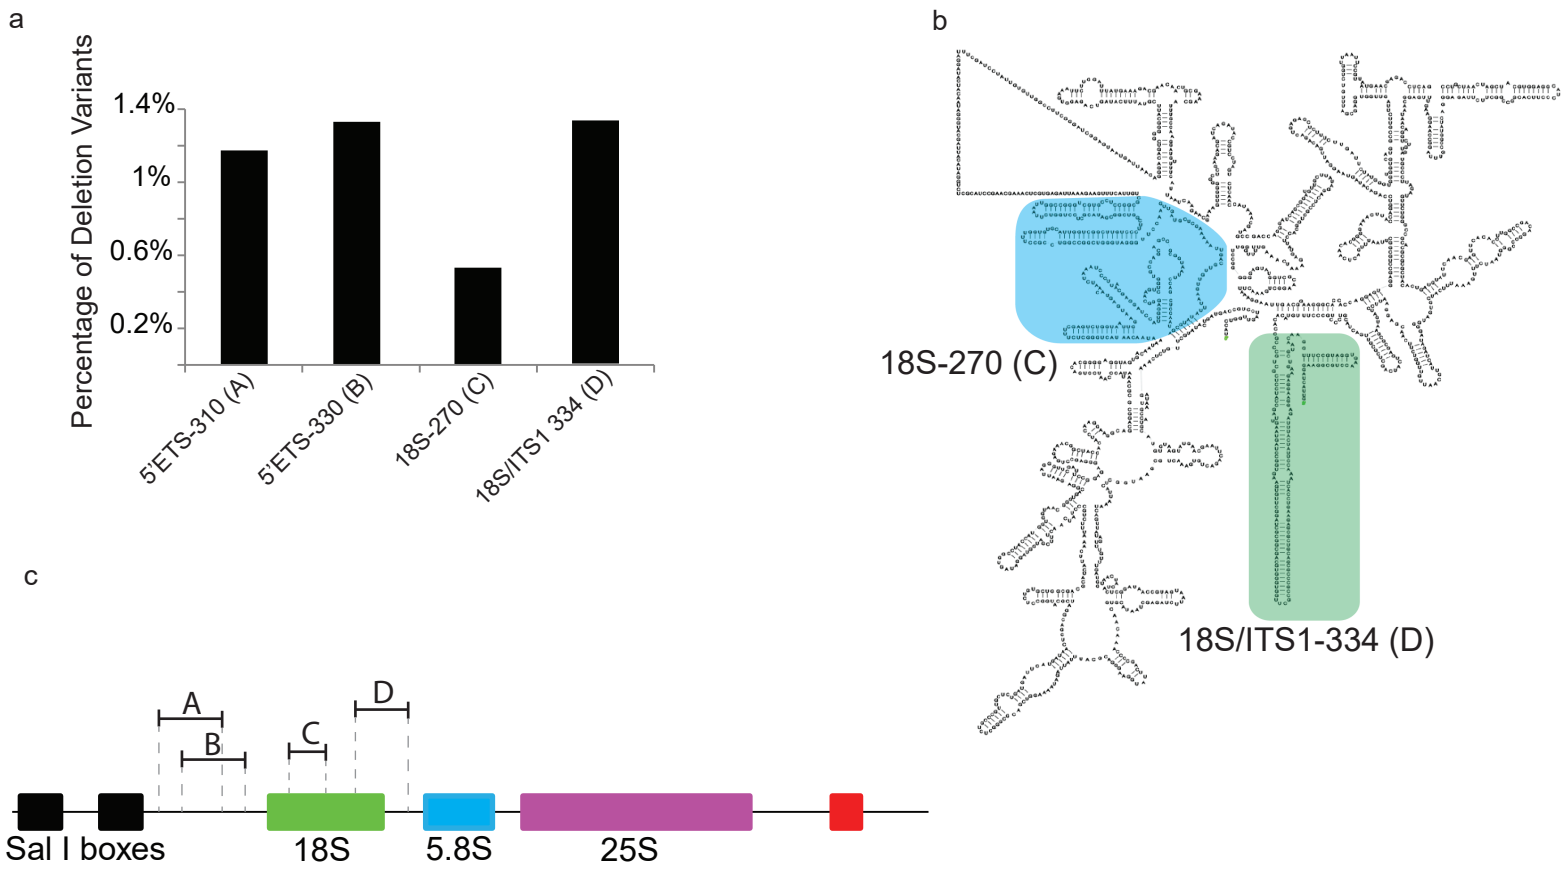

**Supplementary Fig. 3: NOR2 contains a heterogeneous population of rDNA units**

**a**, Percentage of rDNA deletion variants within the 5'ETS, 18S and spanning the 18S-ITS1 region. **b**, 2D structure of the 18S rRNA 37. Regions that would be theoretically lost in processed 18S rRNA transcribed from units encoding deletions are highlighted. Light blue shows the 270 bp deletion within the 18S<sup>19</sup> ("C"), light green shows the 334bp deletion that spans the 18S and the ITS1 ("D"). **c**, Graphical depiction of an rDNA unit with identified deletions indicated.

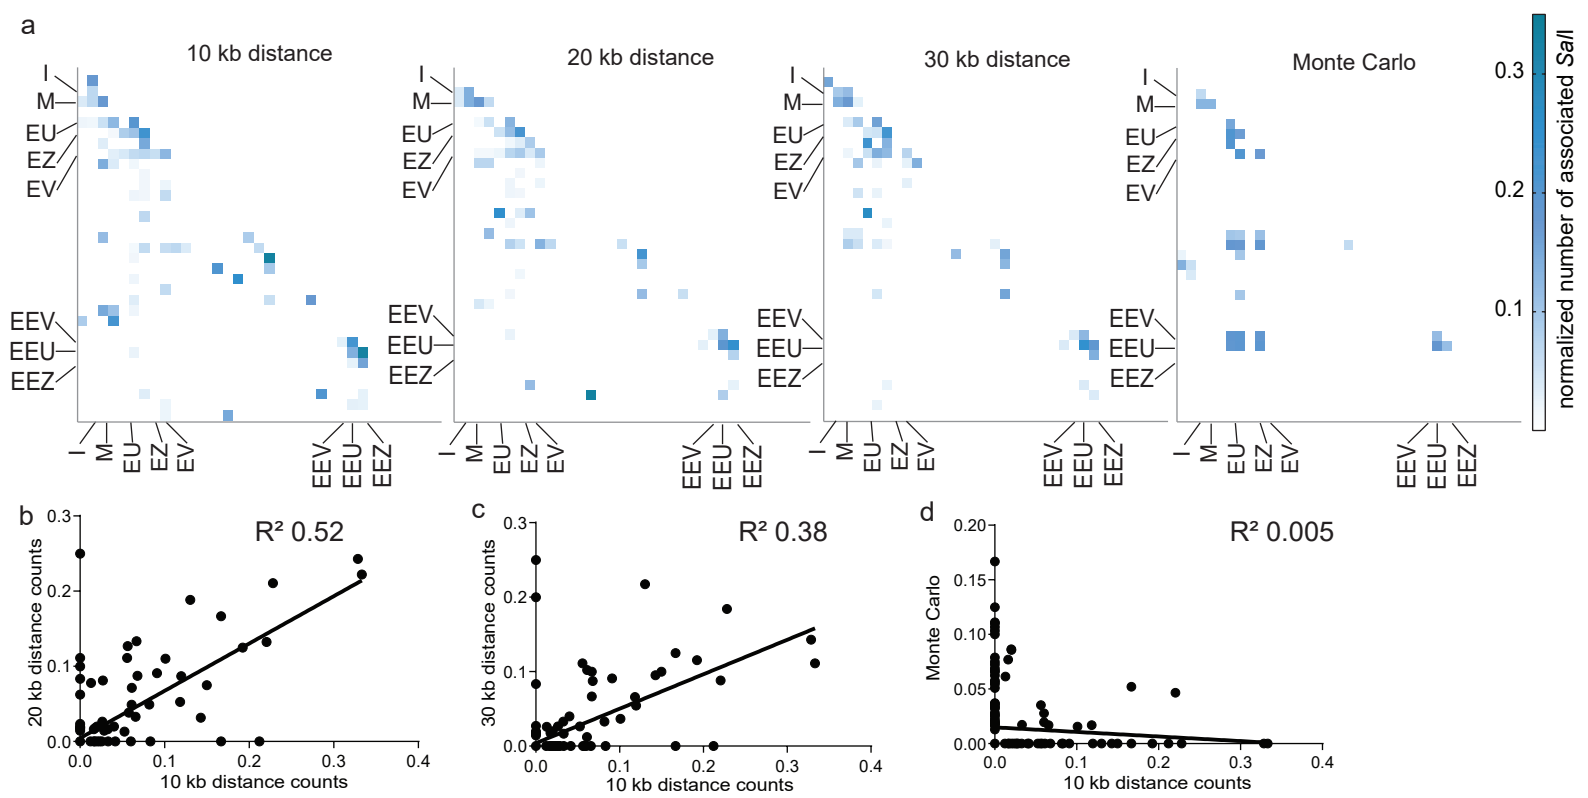

### Supplementary Fig. 4: NOR2 is organized in distinct rDNA sub-clusters

**a**, Heat maps depicting the number of associated rDNA units carrying different SaII box combinations at a 10kb (immediate neighbor), 20kb (neighbor one unit downstream) or 30kb (neighbor two units downstream) distance. The random control (10kb) was performed following a Monte Carlo simulation. Counts were normalized to the numbers of involved rDNA units. Blue color depicts the highest count (0.35) and whites the lowest (0). SaII boxes are listed as follows for each heat map on the y-axis from top to bottom and for the x-axis from left to right: EE, EU, EZ, E $\psi$ , EV, EM, ER, EO, EW, ET, E $\lambda$ , E $\rho$ , E&, EDT, EDU, EDV, EEV, EEU, EEZ, EE $\psi$ , EEE, EEEU, EEEV, EEET, EEEET, FQ, FT, FY, FD, FV, FU, F, E, I, M (see Table 1 for glossary). **b-d**, Scatter plots showing the correlation between the frequencies of associated repeats carrying different SaII box combinations at a 10 kb distance compared to: **b**, 20kb distance ( $R^2=0.52$ ); **c**, 30 kb distance ( $R^2=0.38$ ); **d**, Monte Carlo random control ( $R^2=0.005$ ).

| BAC    | rDNA variant | Multiplexing – Sample number | Cutoff size (kb) | Reads | Illumina | AF Aval (Illumina) | AF CAT (Illumina) | AF Aval (Nanopore) | AF CAT (Nanopore) |
|--------|--------------|------------------------------|------------------|-------|----------|--------------------|-------------------|--------------------|-------------------|
| F2J17  | 1            | Individually sequenced       | > 90             | 1231  | Yes      | 37.73%             | 35.02%            | 25.00%             | 25.00%            |
| F1E12  | 1,3          | Individually sequenced       | > 120            | 1786  | Yes      | 29.89%             | 54.82%            | 25.00%             | 53.00%            |
| F1A20  | 1,3          | M7886 - (84777)              | > 70             | 135   | Yes      |                    |                   |                    |                   |
| F1C17  | 1,3          | M9626 - (108943)             | > 50             | 182   | Yes      |                    |                   |                    |                   |
| F1C20  | 1,3          | M7869 - (84780)              | > 60             | 65    | Yes      |                    |                   |                    |                   |
| F1A18  | 3            | M7869 - (84781)              | > 50             | 71    | Yes      |                    |                   |                    |                   |
| F2I20  | 1,3          | M7869 - (84785)              | > 70             | 30    | Yes      | 8.50%              | 6.92%             | 14.00%             | 14.00%            |
| F1B23  | 1            | M7869 - (84787)              | > 80             | 80    | Yes      |                    |                   |                    |                   |
| F1D8   | 1            | M8410 - (93327)              | > 70             | 63    | Yes      | 59.50%             | 56.02%            | 62.00%             | 62.00%            |
| F1E1   | 1            | M8410 - (93328)              | > 70             | 40    | Yes      | 33.37%             | 39.08%            | 50.00%             | 50.00%            |
| F1E20  | 1            | M8410 - (93329)              | > 60             | 93    | Yes      |                    |                   |                    |                   |
| F1F4   | 1,3          | M8410 - (93330)              | > 60             | 283   | Yes      |                    | 29.53%            |                    | 22.00%            |
| F1F5   | 1,3          | M8410 - (93331)              | > 70             | 108   | Yes      | 19.67%             | 16.18%            | 22.00%             | 22.00%            |
| F1F11  | 1            | M8410 - (93332)              | > 50             | 63    | Yes      | 31.00%             | 39.96%            | 40.00%             | 40.00%            |
| F1F16  | 1            | M8410 - (93333)              | > 60             | 158   | Yes      |                    | 7.92%             |                    | 10.00%            |
| F1F17  | 1            | M8410 - (93334)              | > 50             | 354   | Yes      | 23.65%             | 21.26%            | 25.00%             | 25.00%            |
| F1G11  | 1,3          | M8410 - (93335)              | > 60             | 48    | Yes      |                    | 24.92%            |                    | 28.00%            |
| F1I9   | 1,3          | M8410 - (93336)              | > 40             | 132   | Yes      | 28.56%             | 26.89%            | 22.00%             | 22.00%            |
| F1K15  | 1,3          | M8410 - (93337)              | > 70             | 103   | Yes      |                    | 36.70%            |                    | 37.50%            |
| F1H16  | 1            | M8713 - (97105)              | > 80             | 264   | Yes      |                    |                   |                    |                   |
| F1H23  | 1,3          | M8526 - (95136)              | > 70             | 108   | Yes      |                    |                   |                    |                   |
| F1J10  | 1            | M8526 - (95138)              | > 70             | 346   | Yes      |                    |                   |                    |                   |
| F1K10  | 1            | M8526 - (95139)              | > 70             | 405   | Yes      | 55.01%             | 48.12%            | 50.00%             | 50.00%            |
| F1L21  | 1,3          | M8526 - (95141)              | All reads        | 3748  | Yes      |                    | 10.54%            |                    | 20.00%            |
| F1M1   | 1            | M8526 - (95142)              | > 70             | 385   | Yes      | 37.43%             | 33.95%            | 37.00%             | 37.00%            |
| F1N7   | 1            | M9626 - (108940)             | > 50             | 114   | Yes      | 34.83%             | 32.39%            | 37.00%             | 37.00%            |
| F2I6   | 1,3          | M8713 - (97104)              | > 70             | 626   | Yes      |                    | 28.76%            |                    | 38.00%            |
| F1P17  | 1            | M8713 - (97107)              | > 40             | 2010  | Yes      |                    |                   |                    |                   |
| F2C3   | 1            | M8713 - (97109)              | > 70             | 228   | Yes      | 43.57%             | 48.17%            | 45.00%             | 45.00%            |
| F2D9   | 1            | M8713 - (97110)              | > 80             | 1334  | Yes      | 42.66%             | 40.13%            | 44.00%             | 44.00%            |
| F2E13  | 1,3          | M8713 - (97111)              | > 60             | 378   | Yes      |                    |                   |                    |                   |
| F2G13  | 1,3          | M8713 - (97113)              | > 80             | 183   | Yes      |                    |                   |                    |                   |
| F2G18  | 1,3          | M8713 - (97114)              | > 80             | 1941  | Yes      | 30.60%             | 80.15%            | 40.00%             | 90.00%            |
| F2G3   | 1,3          | M8713 - (97115)              | > 80             | 325   | Yes      | 8.66%              | 10.04%            | 12.00%             | 20.00%            |
| F2I8   | 1,3          | M9344 - (103502)             | > 60             | 136   | Yes      | 19.08%             | 20.03%            | 22.00%             | 22.00%            |
| F2J3   | 1            | M9344 - (103502)             | > 60             | 112   | Yes      |                    | 9.36%             |                    | 10.00%            |
| F2J9   | 1            | M9886 - (112593)             | > 50             | 170   | Yes      |                    |                   |                    |                   |
| F2J21  | 1,3          | M9886 - (112592)             | > 50             | 232   | Yes      | 33.37%             | 67.57%            | 25.00%             | 75.00%            |
| F2M18  | 1,3          | M9344 - (103507)             | > 60             | 57    | Yes      | 20.46%             | 9.85%             | 25.00%             | 12.50%            |
| F2L11  | 1,3          | M9886 - (112591)             | > 50             | 206   | Yes      |                    | 21.54%            |                    | 20.00%            |
| F2L18  | 1,3          | M9344 - (103509)             | > 70             | 149   | Yes      |                    | 18.41%            |                    | 28.00%            |
| F2L21  | 1,3          | M9344 - (103510)             | > 60             | 83    | Yes      | 21.74%             | 19.28%            | 26.00%             | 26.00%            |
| F2M10  | 1            | M9344 - (103511)             | > 60             | 135   | Yes      | 29.04%             | 25.78%            | 33.00%             | 33.00%            |
| F2M12  | 1            | M9344 - (103512)             | > 70             | 41    | Yes      |                    | 9.18%             |                    | 11.00%            |
| F2M13  | 1            | M9344 - (103513)             | > 60             | 93    | Yes      | 22.49%             | 20.39%            | 33.00%             | 33.00%            |
| F2N4   | 1            | M9386 - (104608)             | > 50             | 191   | Yes      |                    |                   |                    |                   |
| F2O12  | 1,3          | M9386 - (104609)             | > 60             | 48    | Yes      |                    | 36.28%            |                    | 28.00%            |
| F2O18  | 1,3          | M9886 - (112589)             | > 50             | 45    | Yes      | 15.73%             | 16.05%            |                    | 20.00%            |
| F2O4   | 1            | M9626 - (108947)             | > 50             | 318   | Yes      |                    | 20.92%            |                    | 25.00%            |
| F2P1   | 1,3          | M9386 - (104613)             | > 60             | 63    | No       |                    |                   |                    |                   |
| F16K18 | 1            | M9886 - (112595)             | > 50             | 126   | No       |                    |                   |                    |                   |
| F16L16 | 1,3          | M10004 - (114460)            | > 50             | 154   | No       |                    |                   |                    |                   |
| F16L21 | 1,4          | M10004 - (114461)            | > 50             | 21    | No       |                    |                   |                    |                   |
| F17A7  | 1            | M10004 - (114464)            | > 50             | 90    | No       |                    |                   |                    |                   |
| F16P19 | 1            | M10004 - (114465)            | > 50             | 469   | No       |                    |                   |                    |                   |
| F19A6  | 1,3          | M10084 - (115248)            | > 50             | 50    | No       |                    |                   |                    |                   |
| F18E22 | 1,3          | M10084 - (115249)            | > 50             | 77    | No       |                    |                   |                    |                   |
| F18E11 | 1,3          | M10084 - (115250)            | > 50             | 58    | No       |                    |                   |                    |                   |
| F18C10 | 1,3          | M10084 - (115251)            | > 50             | 77    | No       |                    |                   |                    |                   |

**Supplementary Table 1: Sequencing and polishing BACs containing rDNA contigs**

List of all BACs sequenced with their rDNA variant type, sample number, read cut-off size, number of reads used for the assembly and allelic frequency of two SNP/InDels (Aval and CAT) derived from the Illumina sequencing (Illumina) and the long-read assembly (NanoPore)

| POS  | Allele Frequencies |       |       |       |       |       |       |          |
|------|--------------------|-------|-------|-------|-------|-------|-------|----------|
|      | WG                 | AL    | YL    | INFLO | S     | AL-DB | YL-DB | INFLO-DB |
| 4721 | 0.0051             | 0.00% | 0.00% | 0.00% | 0.00% | 0.00% | 0.00% | 0.00%    |
| 4866 | 0.0052             | 0.00% | 0.00% | 0.00% | 0.00% | 0.00% | 0.00% | 0.00%    |
| 4897 | 0.0037             | 0.00% | 0.00% | 0.00% | 0.00% | 0.00% | 0.00% | 0.00%    |
| 4934 | 0.0147             | 0.00% | 0.00% | 0.00% | 0.00% | 0.00% | 0.00% | 0.00%    |
| 5157 | 0.0183             | 0.00% | 0.00% | 0.00% | 0.00% | 0.00% | 0.00% | 0.00%    |
| 5265 | 0.0067             | 0.00% | 0.00% | 0.00% | 0.00% | 0.00% | 0.00% | 0.00%    |
| 5335 | 0.0062             | 0.00% | 0.00% | 0.00% | 0.00% | 0.00% | 0.00% | 0.00%    |
| 5356 | 0.0075             | 0.00% | 0.00% | 0.00% | 0.00% | 0.00% | 0.00% | 0.00%    |
| 5515 | 0.0028             | 0.00% | 0.00% | 0.00% | 0.00% | 0.00% | 0.00% | 0.00%    |
| 5736 | 0.0219             | 1.74% | 2.17% | 1.11% | 2.00% | 4.23% | 0.78% | 4.47%    |
| 5932 | 0.0036             | 0.00% | 0.00% | 0.00% | 0.00% | 0.00% | 0.00% | 0.00%    |
| 6065 | 0.0031             | 0.00% | 0.00% | 0.00% | 0.00% | 0.00% | 0.00% | 0.00%    |
| 6082 | 0.0091             | 0.00% | 0.00% | 0.00% | 0.00% | 0.00% | 0.00% | 0.00%    |
| 6255 | 0.0075             | 0.00% | 0.00% | 0.00% | 0.00% | 0.00% | 0.00% | 0.00%    |
| 6256 | 0.0075             | 0.00% | 0.00% | 0.00% | 0.00% | 0.00% | 0.00% | 0.00%    |
| 6389 | 0.0054             | 0.00% | 0.00% | 0.00% | 0.00% | 0.00% | 0.00% | 0.00%    |
| 6413 | 0.0084             | 0.00% | 0.00% | 0.00% | 0.00% | 0.00% | 0.00% | 0.00%    |
| 6582 | 0.0035             | 0.00% | 0.00% | 0.00% | 0.00% | 0.00% | 0.00% | 0.00%    |
| 6680 | 0.0345             | 7.00% | 8.13% | 8.48% | 4.81% | 5.57% | 3.69% | 5.91%    |
| 6712 | 0.0034             | 0.00% | 0.00% | 0.00% | 0.00% | 0.00% | 0.00% | 0.00%    |
| 6748 | 0.0033             | 0.00% | 0.00% | 0.00% | 0.00% | 0.00% | 0.00% | 0.00%    |
| 6759 | 0.0067             | 0.00% | 0.00% | 0.00% | 0.00% | 0.51% | 0.00% | 0.00%    |
| 6888 | 0.0044             | 0.00% | 0.00% | 0.00% | 0.00% | 0.00% | 0.00% | 0.00%    |
| 7172 | 0.0067             | 0.00% | 0.00% | 0.00% | 0.00% | 0.00% | 0.00% | 0.00%    |
| 7181 | 0.0051             | 0.00% | 0.00% | 0.00% | 0.00% | 0.00% | 0.00% | 0.00%    |
| 7382 | 0.0075             | 0.00% | 0.00% | 0.00% | 0.00% | 1.51% | 0.00% | 0.00%    |
| 7395 | 0.0188             | 0.00% | 0.00% | 0.00% | 0.00% | 0.00% | 0.00% | 0.00%    |
| 7422 | 0.003              | 0.00% | 0.00% | 0.00% | 0.00% | 0.00% | 0.00% | 0.00%    |
| 7440 | 0.0053             | 1.57% | 0.00% | 1.62% | 0.00% | 4.44% | 0.00% | 3.03%    |
| 7588 | 0.0063             | 0.00% | 0.00% | 0.00% | 0.00% | 0.00% | 0.00% | 0.00%    |
| 7847 | 0.0096             | 4.72% | 5.01% | 5.03% | 3.28% | 0.00% | 1.55% | 0.00%    |
| 7869 | 0.0057             | 1.03% | 1.20% | 0.00% | 0.00% | 3.62% | 0.70% | 0.00%    |
| 7902 | 0.0084             | 0.00% | 0.00% | 3.99% | 0.00% | 0.00% | 0.00% | 0.00%    |
| 7987 | 0.0049             | 0.00% | 0.00% | 0.00% | 0.00% | 0.00% | 0.00% | 0.00%    |

**Supplementary Table 2: rRNA variants are differentially expressed between tissues**

List of the allelic frequencies, based on the ribosome capture RNA-seq and online retrieved polysome sequencing profiles, occurring along the 25S rRNA for each tissue analyzed. Positions (POS), whole genome (WG), adult leaves (AL), young leaves (YL), inflorescences (INFLO), siliques (S), adult leaves online data base (AL-DB), young leaves online data base (YL-DB), inflorescences online data base (INFLO-DB).

Supplementary Table 3: BACs assemblies and accession number  
 List of all BACs and their accession number as deposited on the NCBI server.

| BAC    | Accession Number |
|--------|------------------|
| f1a18  | MT602556         |
| f1a20  | MT602557         |
| f1b23  | MT602558         |
| f1c17  | MT602559         |
| f1c20  | MT602560         |
| f1d8   | MT602561         |
| f1e1   | MT602562         |
| f1e12  | MT602563         |
| f1e20  | MT602564         |
| f1f4   | MT602565         |
| f1f5   | MT602566         |
| f1f11  | MT602567         |
| f1f16  | MT602568         |
| f1f17  | MT602569         |
| f1g11  | MT602570         |
| f1h16  | MT602571         |
| f1h23  | MT602572         |
| f1i9   | MT602573         |
| f1j10  | MT602574         |
| f1k10  | MT602575         |
| f1k15  | MT602576         |
| f1l21  | MT602577         |
| f1m1   | MT602578         |
| f1n7   | MT602579         |
| f1p17  | MT602580         |
| f2c3   | MT602581         |
| f2d9   | MT602582         |
| f2e13  | MT602583         |
| f2g3   | MT602584         |
| f2g13  | MT602585         |
| f2g18  | MT602586         |
| f2i6   | MT602587         |
| f2i8   | MT602588         |
| f2i20  | MT602589         |
| f2j3   | MT602590         |
| f2j9   | MT602591         |
| f2j17  | MT602592         |
| f2j21  | MT602593         |
| f2l11  | MT602594         |
| f2l18  | MT602595         |
| f2l21  | MT602596         |
| f2m10  | MT602597         |
| f2m12  | MT602598         |
| f2m13  | MT602599         |
| f2m18  | MT602600         |
| f2n4   | MT602601         |
| f2o4   | MT602602         |
| f2o12  | MT602603         |
| f2o18  | MT602604         |
| f2p1   | MT602605         |
| f16k18 | MT602606         |
| f16l16 | MT602607         |
| f16l21 | MT602608         |
| f16p19 | MT602609         |
| f17a7  | MT602610         |
| f18c10 | MT602611         |
| f18e11 | MT602612         |
| f18e22 | MT602613         |
| f19a6  | MT602614         |



Supplementary Table 4: Nanopore Runs  
 List of all Nanopore sequencing runs and their details

| Multiplex | Number of Reads | Base Pairs | Quality mean/median | Reads/bp > Q7 | Read Length N50 / mean in bp |
|-----------|-----------------|------------|---------------------|---------------|------------------------------|
| 10084     | 573 K           | 2,3 GB     | 10.1/10.6           | 473.2K/2GB    | 9199/3955.21                 |
| 10004     | 933.6 K         | 8.5 GB     | 11.4/12.1           | 841.4K/8GB    | 15667/9121.3                 |
| 9886      | 1.1 M           | 6.9 GB     | 11.0/11.07          | 974.6K/6.5GB  | 16749/6362.15                |
| 9626      | 2.3M            | 7.4 GB     | 9.7/9.5             | 1.9M/6.6M     | 14093/3272.35                |
| 9386      | 2.9M            | 10.7GB     | 10.1/9.8            | 2.6M/9.9GB    | 10222/3636.69                |
| 9344      | 6978K           | 4.5GB      | 9.8/10.2            | 613.2K/4.2GB  | 15450/6400.05                |
| 8713      | 777.8K          | 6.6GB      | 9.2/9.8             | 675.5K/6.2GB  | 27379/8421.99                |
| 8526      | 2.3M            | 14.6GB     | 6.5/6.5             | 939.8K/6.8GB  | 13712/6347.05                |
| 8410      | 1.6M            | 6GB        | 8.7/9.1             | 1.3M/5.3GB    | 9962/3701.86                 |
| 7886      | 381.6K          | 3.7GB      | 9.2/9.9             | 324.8K/3.5GB  | 27213/9745.63                |
