# Supplementary material for: Sequencing of the Arabidopsis NOR2 reveals its distinct organization and tissue-specific rRNA ribosomal variants
Source: PubMed Central journal article supplement (PMC7810690; doi:10.1038/s41467-020-20728-6), 2021-01-15
Supplement: 41467_2020_20728_MOESM9_ESM.pdf [file 41467_2020_20728_MOESM9_ESM.pdf]

**Supplementary File 3: rDNA units categorized by their features**  
Barcoded Contigs

**F2D9**

|          | 1         | 2             | 3             | 4             | 5             | 6             | 7             | 8             | 9              |
|----------|-----------|---------------|---------------|---------------|---------------|---------------|---------------|---------------|----------------|
| Position | 0 - 17650 | 17650 - 28737 | 28738 - 39827 | 39828 - 50909 | 50910 - 61972 | 61973 - 73031 | 73032 - 84686 | 84687 - 95738 | 95739 - 101788 |
|          | 3(EEV)111 | 3(EEV)001     | 3(EEV)111     | 3(EEV)001     | 3(EEU)011     | 3(EEU)111     | 4(EEEU)101    | 3(EDU)001     | Incomplete     |

**F1P17**

|          | 1             | 2             | 3             | 4             | 5             | 6             | 7             | 8            |
|----------|---------------|---------------|---------------|---------------|---------------|---------------|---------------|--------------|
| Position | 77262 - 86955 | 66575 - 77261 | 56188 - 66574 | 45257 - 56187 | 34568 - 45256 | 23653 - 34567 | 12975 - 23652 | 3280 - 12974 |
|          | 2(EE)001      | 2(EZ)001      | 2(EZ)001A     | 2(Eλ)001      | 2(EZ)001      | 2(EΨ)001      | 2(EY)001      | 2(EE)001     |

**F2C3**

|          | 1               | 2               | 3               | 4              | 5             | 6             | 7             | 8             | 9             | 10            | 11            |
|----------|-----------------|-----------------|-----------------|----------------|---------------|---------------|---------------|---------------|---------------|---------------|---------------|
| Position | 124792 - 135868 | 113713 - 124791 | 102023 - 113712 | 90945 - 102022 | 79259 - 90944 | 68794 - 79868 | 57720 - 68793 | 46667 - 57719 | 35605 - 46666 | 24531 - 35604 | 13455 - 24530 |
|          | 3(EEV)001       | 3(EEV)111       | 4(EEEV)001      | 3(EEV)111      | 3(EEV)011     | 3(EEV)001     | 3(EEU)111     | 3(EEU)001     | 3(EEU)111     | 3(EEU)111     | 3(EEU)001     |

**F2E13**

|          | 1              | 2             | 3             | 4             | 5             | 6             | 7             | 8                                                                                          |
|----------|----------------|---------------|---------------|---------------|---------------|---------------|---------------|--------------------------------------------------------------------------------------------|
| Position | 98217 - 108412 | 87641 - 98216 | 77381 - 87640 | 66910 - 77380 | 56441 - 66909 | 45992 - 56440 | 35624 - 45991 | 15937 - 35623                                                                              |
|          | 2(EV)001C      | 2(EZ)003      | 2(FQ)001      | 2(EV)001      | 2(EV)001      | 2(EU)001      | 2(EZ)001      | 2(EU)001                                                                                   |
|          |                |               |               |               |               |               |               | Note to repeat 8: this repeat is 20000 bp long! It seems that 2 repeats are fused together |

**F2G3**

|          | 1             | 2             | 3             | 4             | 5             | 6             | 7             | 8            |
|----------|---------------|---------------|---------------|---------------|---------------|---------------|---------------|--------------|
| Position | 80994 - 91466 | 70596 - 80993 | 60247 - 70595 | 49571 - 60246 | 40187 - 49570 | 29728 - 40186 | 19267 - 29727 | 8804 - 19266 |
|          | 2(EV)001      | 2(EW)003      | 2(EV)113      | 2(EZ)001      | 1(M)011       | 2(EU)001      | 2(EU)001      | 1(EU)001     |

**F2G13**

|          | 1            | 2             | 3             | 4             | 5             | 6             | 7             | 8                                              |
|----------|--------------|---------------|---------------|---------------|---------------|---------------|---------------|------------------------------------------------|
| Position | 8581 - 19260 | 19260 - 40608 | 40609 - 51287 | 51288 - 61965 | 61966 - 72628 | 72629 - 83282 | 83283 - 93947 | 93948 - 99602                                  |
|          | 2(EZ)001     | 2(EZ)001      | 2(EZ)001      | 2(EZ)001      | 2(EZ)001      | 2(EZ)001      | 2(EZ)001      | 2(EZ)                                          |
|          |              |               |               |               |               |               |               | Note to repeat 8: only the promoter is present |

**F2G18**

|          | 1       | 2             | 3             | 4             | 5             | 6             | 7             | 8             | 9             | 10             |
|----------|---------|---------------|---------------|---------------|---------------|---------------|---------------|---------------|---------------|----------------|
| Position |         | 21619 - 31752 | 31753 - 41076 | 41077 - 50300 | 50301 - 59566 | 59567 - 68669 | 68670 - 77771 | 77772 - 87037 | 87038 - 96308 | 96309 - 105570 |
|          | 1(M)013 | 2(FQ)013      | 1(F)011       | 1(M)013       | 1(I)111       | 1(E)111       | 1(E)111       | 1(M)013       | 1(I)111       | 1(M)013        |

**F1A18**

|          | 1            | 2             | 3             | 4             | 5             | 6             |
|----------|--------------|---------------|---------------|---------------|---------------|---------------|
| Position | 8447 - 18769 | 18769 - 29088 | 29089 - 39402 | 39403 - 49699 | 49700 - 60002 | 60003 - 70303 |
|          | 2(FU)003     | 2(FU)003      | 2(FT)003      | 2(FT)003      | 2(FT)003      | 2(FT)003      |
|          |              |               | C             | C             | T             | C             |

**F2I6**

|          | 1            | 2             | 3             | 4             | 5             | 6             | 7             | 8             | 9             | 10             | 11              | 12              | 13              |
|----------|--------------|---------------|---------------|---------------|---------------|---------------|---------------|---------------|---------------|----------------|-----------------|-----------------|-----------------|
| Position | 7337 - 16791 | 16789 - 26058 | 26059 - 36119 | 36120 - 46270 | 46271 - 55407 | 55408 - 65459 | 65460 - 74503 | 74504 - 84968 | 84969 - 93887 | 93888 - 103155 | 103156 - 113205 | 113206 - 123646 | 123647 - 132866 |
|          | 1(??)013     | 1(I)001       | 2(EM)001      | 2(FQ)013      | 1(I)013       | 2(EM)011      | 1(M)011D      | 2(EV)001      | 1(M)013D      | 1(I)001        | 2(EM)001        | 2(EU)001        | 1(M)013         |

Note to repeat 1: the initial part of the repeat is missing

**F1A20**

|          | 1             | 2             | 3             | 4             | 5             | 6        |
|----------|---------------|---------------|---------------|---------------|---------------|----------|
| Position | 10318 - 20544 | 20545 - 30768 | 30769 - 40981 | 40982 - 51192 | 51193 - 61749 | 61750 -  |
|          | 2(FT)003      | 2(FT)003      | 2(FT)003      | 2(FT)003      | 2(FY)001      | 2(ET)003 |
|          | C             | C             | T             | C             |               |          |

**F1B23**

|          | 1            | 2             | 3             | 4             | 5             | 6             | 7             | 8             | 9              | 10              |
|----------|--------------|---------------|---------------|---------------|---------------|---------------|---------------|---------------|----------------|-----------------|
| Position | 8583 - 19276 | 19276 - 29960 | 29961 - 40650 | 40651 - 51329 | 51330 - 62011 | 62012 - 72666 | 72667 - 83329 | 83330 - 93771 | 93772 - 104440 | 104441 - 115108 |
|          | 2(EZ)001     | 2(EZ)001      | 2(EZ)001      | 2(EZ)001      | 2(EZ)001      | 2(EZ)001      | 2(EZ)001      | 2(EU)001      | 2(EZ)001       | 2(EZ)001        |

**F1E1**

|          | 1             | 2             | 3             | 4             | 5             | 6             | 7             | 8             |
|----------|---------------|---------------|---------------|---------------|---------------|---------------|---------------|---------------|
| Position | 10526 - 21628 | 21629 - 31959 | 31960 - 43040 | 43041 - 54098 | 54099 - 65154 | 65155 - 76213 | 76214 - 87278 | 87279 - 98342 |
|          | 3(FEV)111     | 2(FS)001      | 3(EEV)111     | 3(EEV)111     | 3(EEU)001     | 3(EEU)111     | 3(EEU)111     | 3(EEU)001     |

**F1C20**

|          | 1             | 2             | 3             | 4             | 5             | 6             |
|----------|---------------|---------------|---------------|---------------|---------------|---------------|
| Position | 13032 - 23348 | 23349 - 33670 | 33671 - 43967 | 43968 - 54267 | 54268 - 64221 | 64222 - 74399 |
|          | 2(FU)003      | 2(FU)003      | 2(FU)003      | 2(EU)003      | 1(Z)003       | 2(EO)003      |

**F1E12**

|  | 1             | 2             | 3             | 4             | 5             | 6             | 7             | 8             | 9              | 10              | 11              | 12              |
|--|---------------|---------------|---------------|---------------|---------------|---------------|---------------|---------------|----------------|-----------------|-----------------|-----------------|
|  | 12165 - 22515 | 22516 - 33215 | 33216 - 43083 | 43084 - 53428 | 53429 - 64124 | 64126 - 75041 | 75042 - 85732 | 85733 - 96424 | 96425 - 107115 | 107116 - 118801 | 118802 - 129481 | 129482 - 138284 |
|  | 2(EV)003      | 2(EV)001      | 2(EZ)003C     | 2(FQ)003      | 2(EU)111      | 2(EZ)011      | 2(EΨ)011      | 2(EZ)111      | 2(EZ)011       | 2(EZ)011        | 4(EEEU)111      | 2(EZ)001        |

**F1F4**

|  | 1             | 2             | 3             | 4             | 5             | 6             | 7             | 8             | 9             |
|--|---------------|---------------|---------------|---------------|---------------|---------------|---------------|---------------|---------------|
|  | 10574 - 19834 | 19835 - 30303 | 30304 - 39230 | 39231 - 49366 | 49307 - 58628 | 58629 - 68665 | 68666 - 78788 | 78789 - 88037 | 88038 - 98478 |
|  | 1(I)001       | 2(EU)001      | 1(M)003D      | 2(FQ)013      | 1(I)001       | 2(EM)001      | 2(FQ)013      | 1(I)001       | 2(EU)001      |

Note to repeat 8: Sall box (I) is 454 bp long

**F1F5**

|  | 1             | 2             | 3             | 4             | 5             | 6             | 7             | 8             | 9            |
|--|---------------|---------------|---------------|---------------|---------------|---------------|---------------|---------------|--------------|
|  | 95031 - 84541 | 74390 - 84540 | 64257 - 74389 | 53790 - 64256 | 43375 - 53789 | 33998 - 43374 | 23882 - 33997 | 13434 - 23881 | 2992 - 13433 |
|  | 2(EZ)003      | 2(FQ)003      | 2(FQ)003      | 2(EV)111      | 2(EU)001      | 1(N)003       | 1(\$)003      | 2(EU)111      | 2(EU)001     |

Note to repeat 4: Sall box(V) is 1054 bp long

**F1F11**

|  | 1             | 2             | 3             | 4             | 5             |
|--|---------------|---------------|---------------|---------------|---------------|
|  | 16818 - 27895 | 27895 - 38963 | 38694 - 50040 | 50041 - 61079 | 61080 - 69043 |
|  | 3(EEV)001     | 3(EEU)111     | 3(EEV)001     | 3(EEU)?11     | 4(EEEU)00?    |

Note to repeat 1: : Note to repeat 2: S: Note to repeat 3: Note to repeat 4: Note to repeat 5: it is not possible to determine variant type

**F1E20**

|  | 1             | 2             | 3             | 4             | 5             | 6             | 7             | 8             |
|--|---------------|---------------|---------------|---------------|---------------|---------------|---------------|---------------|
|  | 97540 - 86608 | 75033 - 86608 | 64575 - 75032 | 54420 - 64574 | 44300 - 54419 | 34171 - 44299 | 23823 - 34170 | 13595 - 23824 |
|  | 2(Eλ)001      | 4(EET)001     | 2(EV)001      | 2(EV)001      | 2(EU)001      | 2(EU)001      | 2(EZ)001      | 2(EW)001      |

Note to repeat 2: S: Note to repeat 3: Sall box is 1050 bp long

Note to repeat 7: Sall box (Z) is 1250 bp long

F1F16

|         |          |          |          |         |          |          |          |   |
|---------|----------|----------|----------|---------|----------|----------|----------|---|
|         | 1        | 2        | 3        | 4       | 5        | 6        | 7        | 8 |
| 1(M)001 | 2(EU)001 | 2(EU)001 | 2(EY)001 | 1(M)011 | 2(EU)001 | 2(EU)001 | 2(EU)001 |   |

F1G11

|               |               |               |               |               |               |              |   |   |
|---------------|---------------|---------------|---------------|---------------|---------------|--------------|---|---|
|               | 1             | 2             | 3             | 4             | 5             | 6            | 7 | 8 |
| 72154 - 62094 | 52045 - 62094 | 41725 - 52044 | 32481 - 41724 | 23218 - 32480 | 13190 - 23217 | 7316 - 13189 |   |   |
| 2(E&)011      | 2(E&)001      | 2(ES)001      | 1(M)013       | 1(I)001       | 2(E&)001      | 2(EΨ)0??     |   |   |

Note to repeat 1: Sall box (E) is 299 bp long      Note to repeat 4: Sall box (M) is 553 bp long

F1H16

|               |               |               |               |               |               |               |               |                |                 |    |
|---------------|---------------|---------------|---------------|---------------|---------------|---------------|---------------|----------------|-----------------|----|
|               | 1             | 2             | 3             | 4             | 5             | 6             | 7             | 8              | 9               | 10 |
| 12329 - 22493 | 22494 - 33481 | 33482 - 44155 | 44156 - 53852 | 53853 - 64521 | 64522 - 74900 | 74901 - 85808 | 85809 - 96478 | 96479 - 107371 | 107372 - 118033 |    |
| 2(EV)001B     | 2(ELV)001B    | 2(EV)001      | 2(EE)001      | 2(EV)001      | 2(EV)001B     | 2(EΨ)001      | 2(EV)001      | 2(EV)001       | 2(EZ)001        |    |

Note to repeat 1: Sall box (E) is 299 bp long      Note to repeat 2: Sall box V is 1050 bp long      Note to repeat 10: Sall box (Z) is 1252 bp long

F1I9

|               |               |               |               |               |               |               |               |                |   |
|---------------|---------------|---------------|---------------|---------------|---------------|---------------|---------------|----------------|---|
|               | 1             | 2             | 3             | 4             | 5             | 6             | 7             | 8              | 9 |
| 16260 - 27260 | 27260 - 36717 | 36718 - 47118 | 47119 - 57788 | 57789 - 68333 | 68334 - 78478 | 78479 - 88587 | 88588 - 98170 | 98171 - 108747 |   |
| 2(Eρ)003      | 2(FD)003      | 2(EU)111      | 2(EZ)001      | 2(EZ)113      | 2(ER)003      | 2(FQ)003      | 2(FC)001      | 2(Eρ)00?       |   |

Note to repeat 2: Sall box F is 301 bp long

F1K10

|                |               |               |               |               |               |               |               |              |   |
|----------------|---------------|---------------|---------------|---------------|---------------|---------------|---------------|--------------|---|
|                | 1             | 2             | 3             | 4             | 5             | 6             | 7             | 8            | 9 |
| 101665 - 90606 | 79545 - 90605 | 68524 - 79554 | 57489 - 68523 | 46459 - 57488 | 34952 - 46458 | 23989 - 34951 | 14054 - 23988 | 3946 - 14053 |   |
| 3(EEV)001      | 3(EEV)111     | 3(EEV)001     | 3(EEV)001     | 3(EEV)111     | 3(EDT)111     | 2(EU)001      | 2(DU)111      | 2(??)???     |   |

Note to repeat 1: Sall box (E) is 299 bp long      Note to repeat 2: Sall box (E) is 299 bp long      Note to repeat 3: Sall box (E) is 299 bp long      Note to repeat 4: Sall box (E) is 299 bp long      Note to repeat 5: Sall box (E) is 299 bp long      Note to repeat 6: Sall box rearrangement is wierd. Sall box (D) is 224 bp long

F1K15

|               |               |               |               |               |               |               |               |   |
|---------------|---------------|---------------|---------------|---------------|---------------|---------------|---------------|---|
|               | 1             | 2             | 3             | 4             | 5             | 6             | 7             | 8 |
| 10373 - 19629 | 19629 - 30574 | 30575 - 39609 | 39610 - 48871 | 48872 - 58781 | 58782 - 68921 | 68922 - 79079 | 79080 - 89789 |   |
| 1(I)001       | 2(EΨ)001      | 1(H)013       | 1(I)001       | 2(E&)013      | 1(Ψ)013       | 2(DS)001      | 3(EEΨ)        |   |

F1L21

|              |               |               |               |               |   |
|--------------|---------------|---------------|---------------|---------------|---|
|              | 1             | 2             | 3             | 4             | 5 |
| 5930 - 15027 | 15028 - 25450 | 25450 - 36028 | 36029 - 45244 | 45244 - 55473 |   |
| 1(F)001      | 2(EU)001      | 2(EY)001      | 1(E)013       | 2(EU)001      |   |

Note to repeat 2 Sall box (U) is 1047 bp long      Note to repeat 4 Sall box (E) is 253 bp long

F1M1

|               |               |               |               |               |               |               |               |   |
|---------------|---------------|---------------|---------------|---------------|---------------|---------------|---------------|---|
|               | 1             | 2             | 3             | 4             | 5             | 6             | 7             | 8 |
| 10685 - 21764 | 21764 - 32827 | 32828 - 43888 | 43889 - 54964 | 54947 - 65977 | 65978 - 77009 | 77010 - 88133 | 88134 - 98853 |   |
| 3(EEV)001     | 3(EEV)111     | 3(EEV)001     | 3(EEU)111     | 3(EEU)001     | 3(EEU)111     | 3(EEZ)001     | 3(EEU)101     |   |

Note to repeat 1 Sall box (2E) is 298 bp long      Note to repeat 4 Sall box (U) is 1047 bp long      Note to repeat 7 Sall box (U) is 1255 bp long

F2I20

|               |               |               |               |               |               |               |   |
|---------------|---------------|---------------|---------------|---------------|---------------|---------------|---|
|               | 1             | 2             | 3             | 4             | 5             | 6             | 7 |
| 10382 - 20854 | 20855 - 33006 | 33007 - 43171 | 43172 - 53640 | 53641 - 64116 | 64117 - 74369 | 74370 - 85433 |   |

2(EV)111 5(EEEET)001 2(EV)001B 2(EV)001 2(EV)001 2(EW)001B 2(EU)001

**F2J17**

|               |               |               |               |               |               |               |              |   |
|---------------|---------------|---------------|---------------|---------------|---------------|---------------|--------------|---|
|               | 1             | 2             | 3             | 4             | 5             | 6             | 7            | 8 |
| 81054 - 91358 | 69758 - 81053 | 58687 - 69757 | 47500 - 58686 | 36325 - 47399 | 25253 - 36324 | 14177 - 25252 | 3105 - 14176 |   |
| 3(EE)001      | 3(EEZ)001     | 3(EEU)001     | 3(EEZ)001     | 3(EEU)111     | 3(EEU)001     | 3(EEU)001     | 3(EEU)111    |   |

**F1D8**

|               |               |               |               |               |               |               |               |   |
|---------------|---------------|---------------|---------------|---------------|---------------|---------------|---------------|---|
|               | 1             | 2             | 3             | 4             | 5             | 6             | 7             | 8 |
| 11075 - 22184 | 22184 - 33188 | 33189 - 44865 | 44866 - 55941 | 55942 - 66990 | 66991 - 78016 | 78017 - 88446 | 88447 - 99508 |   |
| 3(EEV)001     | 3(EDV)111     | 4(EEEV)111    | 3(EEV)001     | 3(EEU)111     | 3(EEU)111     | 2(EU)001      | 3(EEU)111     |   |

Note to repeat 1: S Note to repeat 2: Sall box (E) is 299 bp long

**F1F17**

|               |               |               |               |               |               |               |                |   |
|---------------|---------------|---------------|---------------|---------------|---------------|---------------|----------------|---|
|               | 1             | 2             | 3             | 4             | 5             | 6             | 7              | 8 |
| 12341 - 23424 | 23425 - 34505 | 34506 - 45799 | 45800 - 56909 | 56910 - 68137 | 68138 - 79239 | 79240 - 90242 | 90243 - 101300 |   |
| 3(EEV)111     | 3(EEV)001     | 3(EEZ)001     | 3(EEU)001     | 3(EEU)001     | 3(EEU)111     | 3(EEU)001     | 3(EEU)001      |   |

Note to repeat 1: : Note to repeat 2: Sall box (V) is 1056 bp long

**F1H23**

|               |               |               |               |               |               |               |              |   |
|---------------|---------------|---------------|---------------|---------------|---------------|---------------|--------------|---|
|               | 1             | 2             | 3             | 4             | 5             | 6             | 7            | 8 |
| 82266 - 92167 | 71893 - 82265 | 61206 - 71892 | 51063 - 61205 | 40100 - 51062 | 29865 - 40099 | 19405 - 29864 | 9291 - 19404 |   |
| 2(EV)001      | 2(EZ)001      | 2(EZ)001      | 2(EU)001      | 3(ELU)001     | 2(EZ)003      | 2(FU)001      | 2(EU)001     |   |

Note to repeat 1: Sall box (V) is 1054 bp long Note to repeat 4: Sall box U is 1046 bp long

**F1J10**

|              |               |               |               |               |               |               |               |                |   |
|--------------|---------------|---------------|---------------|---------------|---------------|---------------|---------------|----------------|---|
|              | 1             | 2             | 3             | 4             | 5             | 6             | 7             | 8              | 9 |
| 6579 - 18122 | 18122 - 28583 | 28584 - 38727 | 38728 - 49771 | 49772 - 39303 | 59304 - 69670 | 69671 - 80276 | 80277 - 90410 | 90411 - 101368 |   |
| 4(EEET)001   | 2(EV)001      | 2(EV)001      | 2(EV)001      | 2(EU)001      | 2(EZ)001      | 2(EZ)001      | 2(EU)001      | 3(ELU)001      |   |

**F2I8**

|               |               |               |               |               |               |               |             |              |   |
|---------------|---------------|---------------|---------------|---------------|---------------|---------------|-------------|--------------|---|
|               | 1             | 2             | 3             | 4             | 5             | 6             | 7           | 8            | 9 |
| 84706 - 95227 | 74230 - 84705 | 63349 - 74229 | 53500 - 63648 | 44049 - 53499 | 33608 - 44048 | 23068 - 33607 | 13619 23067 | 3183 - 13618 |   |
| 2(FV)001      | 2(EV)001      | 2(EZ)003      | 2(FQ)003      | 2(EC)003      | 2(EU)111      | 2(EY)003      | 2(EC)003    | 2(EU)111     |   |

**F2J3**

|               |               |               |               |               |               |               |               |                |   |
|---------------|---------------|---------------|---------------|---------------|---------------|---------------|---------------|----------------|---|
|               | 1             | 2             | 3             | 4             | 5             | 6             | 7             | 8              | 9 |
| 12334 - 22270 | 22271 - 32754 | 32755 - 42020 | 42021 - 52162 | 52163 - 61314 | 61315 - 70586 | 70587 - 80790 | 80791 - 91243 | 91214 - 100490 |   |
| 2(E&)003      | 2(EV)001      | 1(M)003       | 2(FQ)013      | 1(I)003       | 1(I)001       | 2(EP)001      | 2(EU)001      | 1(M)003        |   |

**F2M18**

|               |               |               |               |               |               |               |              |   |
|---------------|---------------|---------------|---------------|---------------|---------------|---------------|--------------|---|
|               | 1             | 2             | 3             | 4             | 5             | 6             | 7            | 8 |
| 75695 - 86275 | 65553 - 75694 | 55408 - 65552 | 44932 - 55407 | 34581 - 44931 | 25203 - 34580 | 14900 - 25202 | 4462 - 14899 |   |
| 2(EZ)003      | 2(FQ)003      | 2(FQ)013      | 2(EV)101      | 2(DT)001      | 1(N)003       | 2(ER)111      | 2(EU)001     |   |

Note to repeat 2: Sall box (F) is 308 bp Note to repeat 4: Sall box(V) is 1054 bp long

**F2L18**

|               |               |               |               |               |               |              |   |
|---------------|---------------|---------------|---------------|---------------|---------------|--------------|---|
|               | 1             | 2             | 3             | 4             | 5             | 6            | 7 |
| 60653 - 70811 | 51381 - 60652 | 41435 - 51380 | 31500 - 41434 | 22219 - 31499 | 11761 - 22218 | 2851 - 11760 |   |

2(FQ)013 1(I)001 2(E&)003 2(E&)003 1(I)001 2(EU)001 1(M)013D

F2L21

1 2 3 4 5 6  
6432 - 16519 16520 - 26796 26797 - 37278 37279 - 47737 47338 - 57990 57991 - 68430  
2(FQ)113 2(FQ)111 2(EV)??1 2(DU)001 2(DQ)001 2(EU)001

F2M10

1 2 3 4 5 6  
55799 - 66888 44711 - 55798 33642 - 44710 22592 - 33641 11543 - 22591 1828 - 11542  
3(EEV)111 3(EEV)001 3(EEU)111 3(EEU)001 3(EEU)001 3(EEU)00?  
Note to repeat 1: ! Note to repeat 2: Sall box (V) is 1051 bp long

F2M12

1 2 3 4 5 6 7 8 9  
16157 - 26646 26647 - 35926 35927 - 46040 46041 - 55303 55304 - 65718 65719 - 74631 74632 - 84715 84716 - 93970 93971 - 104007  
2(EV)001 1(M)003 2(FQ)003 1(I)001 2(EU)001 1(M)003D 2(FQ)013 1(I)001 2(E&)001  
Note to repeat 5: Sall box (U) is 1000 bp long Note to repeat 8: Sall box (I) is 450 bp long

F2M13

1 2 3 4 5 6  
55861 - 66397 45382 - 55860 37703 - 45381 23930 - 34702 13491 - 23929 2833 - 13490  
2(FV)111 2(EV)111 2(EZ)001 2(?U)001 2(EU)001 2(EY)001  
Note to repeat 2: Sall box (V) is 1053 bp long

F2O12

1 2 3 4 5 6 7  
58302 - 67730 48447 - 58501 37529 - 48446 27047 - 37528 17650 - 27046 7177 - 17649 71776 - ????  
1(H)001 2(E&)001 2(EY)001 2(EV)011 1(M)001 2(EU)011 2(EZ)???  
Note to repeat 4: Sall box (V) is 1054 bp long Note to repeat 7: the repeat is incomplete

F2N4

1 2 3 4 5 6  
49965 - 60649 39255 - 49964 28581 - 39254 17886 - 28580 7211 - 17885 17884 - ???  
2(EZ)001 2(EZ)001 2(EZ)001 2(EZ)001 2(EZ)001 2(EZ)???  
Note to repeat 6: the repeat is incomplete

F2P1

1 2 3 4 5  
10075 - 20585 20587 - 31063 31064 - 41529 41530 - 52090 52091 - 62570  
2(FV)001 2(EV)001 2(EU)001 2(EZ)003 2(FU)001  
Note to repeat 1: ! Note to repeat 2: Sall (V) is 1052 bp long

F1N7

1 2 3 4  
12524 - 23626 23627 - 34717 34718 - 45803 45804 - 56875  
3(EEV)111 3(EEV)001 3(EEV)001 3(EEU)111

F1C17

1 2 3 4  
16069 - 26342 26343 - 36824 36825 - 47004 47005 - 57674

2(FQ)001      2(EV)001      2(EU)001C      2(EZ)001

**F2L11**

|               |               |               |               |               |   |
|---------------|---------------|---------------|---------------|---------------|---|
|               | 1             | 2             | 3             | 4             | 5 |
| 16705 - 25863 | 25864 - 35327 | 35328 - 45365 | 45366 - 54619 | 54620 - 64520 |   |
| 1(I)003       | 1(I)003A      | 2(FO)013      | 1(I)001       | 2(E&)001      |   |

**F2O18**

|               |               |                |               |               |   |
|---------------|---------------|----------------|---------------|---------------|---|
|               | 1             | 2              | 3             | 4             | 5 |
| 16358 - 26940 | 26941 - 37082 | 37083 - 472256 | 47227 - 57692 | 57693 - 67177 |   |
| 2(EZ)003      | 2(FQ)003      | 2(FQ)013       | 2(EU)001      | 2(FU)001C     |   |

**F2J21**

|               |               |               |               |   |
|---------------|---------------|---------------|---------------|---|
|               | 1             | 2             | 3             | 4 |
| 17457 - 26568 | 26569 - 35677 | 35678 - 44945 | 44946 - 54201 |   |
| 1(E)001       | 1(E)011       | 1(M)013       | 1(H)111       |   |

**F2J9**

|               |               |               |               |               |               |   |
|---------------|---------------|---------------|---------------|---------------|---------------|---|
|               | 1             | 2             | 3             | 4             | 5             | 6 |
| 12360 - 22759 | 22760 - 33706 | 33707 - 44412 | 44413 - 55332 | 55333 - 66020 | 66021 - 75977 |   |
| 2(EZ)001A     | 2(EA)001      | 2(EZ)001      | 2(EΨ)001      | 2(EZ)001      | 2(EZ)001      |   |

**F16K18**

|               |               |               |               |              |   |
|---------------|---------------|---------------|---------------|--------------|---|
|               | 1             | 2             | 3             | 4            | 5 |
| 43376 - 53866 | 33211 - 43375 | 22706 - 33210 | 13323 - 22705 | 2882 - 13322 |   |
| 2(EV)001      | 2(EV)001      | 2(EV)001      | 1(M)011       | 2(EU)001     |   |

**F17A7**

|               |               |               |              |   |
|---------------|---------------|---------------|--------------|---|
|               | 1             | 2             | 3            | 4 |
| 42038 - 53132 | 30938 - 42037 | 19839 - 30937 | 8755 - 19838 |   |
| 3(EEV)001     | 3(EEV)111     | 3(EEV)111     | 3(EEU)111    |   |

**F19A6**

|              |               |               |               |               |               |   |
|--------------|---------------|---------------|---------------|---------------|---------------|---|
|              | 1             | 2             | 3             | 4             | 5             | 6 |
| 6200 - 15477 | 15478 - 24460 | 24461 - 33888 | 33889 - 43614 | 43615 - 52883 | 52884 - 62084 |   |
| 1(I)111      | 1(M)013       | 1(N)111       | 1(U)001       | 1(I)111       | 1(L)011       |   |

**F16L16**

|               |               |              |   |
|---------------|---------------|--------------|---|
|               | 1             | 2            | 3 |
| 27304 - 37643 | 17151 - 27303 | 6987 - 17150 |   |
| 2(EZ)001      | 2(EU)001      | 2(EU)001     |   |

**F16L21**

|               |               |               |   |
|---------------|---------------|---------------|---|
|               | 1             | 2             | 3 |
| 35506 - 46080 | 46081 - 56481 | 56482 - 66877 |   |
| 2(IV)111      | 2(EV)111      | 2(EU)111      |   |

**F16P19**

|              |               |               |               |   |
|--------------|---------------|---------------|---------------|---|
|              | 1             | 2             | 3             | 4 |
| 6565 - 16969 | 16970 - 27406 | 27407 - 37831 | 37832 - 48222 |   |

2(EV)001      2(EV)001      2(EV)001      2(EU)001

**F18E22**

|               | 1             | 2             | 3             | 4             | 5             | 6             | 7 |
|---------------|---------------|---------------|---------------|---------------|---------------|---------------|---|
| 16466 - 26908 | 26909 - 36309 | 36310 - 46466 | 46467 - 56947 | 56948 - 67405 | 67406 - 77383 | 77383 - 87934 |   |
| 2(EV)001      | 1(O)003       | 2(FQ)003      | 2(EV)111      | 2(EU)001      | 2(ER)001C     | 2(EZ)003      |   |

**F18E11**

|               | 1             | 2             | 3             | 4             | 5            | 6 |
|---------------|---------------|---------------|---------------|---------------|--------------|---|
| 52693 - 62668 | 42657 - 52692 | 32616 - 42656 | 23348 - 32615 | 13303 - 23347 | 2799 - 13302 |   |
| 1(Z)003       | 2(EO)003      | 2(EO)013      | 1(I)001       | 2(E&)001      | 2(EV)001     |   |

**F18C10**

|               | 1             | 2             | 3            | 4 |
|---------------|---------------|---------------|--------------|---|
| 39352 - 49572 | 29277 - 39351 | 19023 - 29276 | 8627 - 19022 |   |
| 2(EV)001      | 2(EU)003      | 2(FQ)001      | 2(EU)001     |   |

**F2O4**

|               | 1             | 2             | 3             | 4 |
|---------------|---------------|---------------|---------------|---|
| 59926 - 70615 | 50533 - 59952 | 40069 - 50532 | 30704 - 40068 |   |
| 2(EZ)001      | 1(M)011       | 2(ET)001      | 1(M)001       |   |
